# Supplementary material for: Evidence of Stage- and Age-Related Heterogeneity of Non-HLA SNPs and Risk of Islet Autoimmunity and Type 1 Diabetes: The Diabetes Autoimmunity Study in the Young
Source: Hindawi journal article supplement (doi:10.1155/2013/417657), 2013-01-01
Supplement: f1 [file 417657.f1.pdf]

**Supplemental Table 1:** Association between Non-HLA T1D Candidate SNPs and Development of IA, Progression from IA to T1D, and Development of T1D Unadjusted for HLA-DR3/4,DQB1\*0302 and First Degree Relative with T1D.

| SNP                                  | Development of IA<br>(n = 1619)      |              | Progression from IA to T1D<br>(n = 132) |         | Development of T1D<br>(n = 1619)     |              |
|--------------------------------------|--------------------------------------|--------------|-----------------------------------------|---------|--------------------------------------|--------------|
|                                      | HR and 95% CI                        | P Value      | HR and 95% CI <sup>a</sup>              | P Value | HR and 95% CI                        | P Value      |
| <i>CIQTNF6</i> (rs229541)            | <b>1.55 (1.18, 2.02)<sup>b</sup></b> | <b>0.001</b> | 1.25 (0.86, 1.83) <sup>b</sup>          | 0.25    | <b>1.94 (1.33, 2.84)<sup>b</sup></b> | <b>0.001</b> |
| <i>C6orf173</i> (rs9388489)          | 1.16 (0.88, 1.52) <sup>b</sup>       | 0.29         | 0.93 (0.68, 1.27) <sup>b</sup>          | 0.66    | 1.05 (0.70, 1.56) <sup>b</sup>       | 0.83         |
| <i>C14orf181</i> (rs1465788)         | 1.00 (0.77, 1.31) <sup>b</sup>       | 0.98         | 1.04 (0.59, 1.84) <sup>c</sup>          | 0.89    | 0.79 (0.46, 1.39) <sup>c</sup>       | 0.42         |
| <i>IL2</i> (rs2069762)               | 1.06 (0.80, 1.40) <sup>b</sup>       | 0.69         | 1.33 (0.88, 2.00) <sup>b</sup>          | 0.18    | 1.19 (0.78, 1.81) <sup>b</sup>       | 0.42         |
| <i>IL2</i> (rs4505848)               | 1.02 (0.79, 1.32) <sup>b</sup>       | 0.88         | 0.93 (0.66, 1.30) <sup>b</sup>          | 0.66    | 1.16 (0.80, 1.68) <sup>b</sup>       | 0.43         |
| <i>IL2RA</i> (rs12722563)            | 0.83 (0.53, 1.30) <sup>c</sup>       | 0.41         | 0.63 (0.23, 1.72) <sup>c</sup>          | 0.37    | <b>0.37 (0.15, 0.92)<sup>c</sup></b> | <b>0.03</b>  |
| <i>IL2RA</i> (rs2104286)             | 0.82 (0.60, 1.10) <sup>b</sup>       | 0.19         | 1.04 (0.59, 1.83) <sup>c</sup>          | 0.90    | 0.66 (0.37, 1.19) <sup>c</sup>       | 0.17         |
| <i>IL7R</i> (rs6897932)              | 0.93 (0.68, 1.29) <sup>b</sup>       | 0.67         | 0.88 (0.51, 1.51) <sup>c</sup>          | 0.64    | 0.84 (0.48, 1.49) <sup>c</sup>       | 0.55         |
| <i>PRKCQ</i> (rs947474)              | 1.11 (0.74, 1.65) <sup>c</sup>       | 0.62         | 0.64 (0.36, 1.12) <sup>c</sup>          | 0.12    | 0.75 (0.40, 1.42) <sup>c</sup>       | 0.38         |
| <i>SKAP2</i> (rs7804356)             | 0.90 (0.66, 1.22) <sup>b</sup>       | 0.49         | 1.32 (0.78, 2.24) <sup>c</sup>          | 0.31    | 0.96 (0.54, 1.69) <sup>c</sup>       | 0.88         |
| <i>SMARCE1</i> (rs7221109)           | 0.94 (0.71, 1.23) <sup>b</sup>       | 0.63         | 0.88 (0.51, 1.51) <sup>b</sup>          | 0.63    | 0.69 (0.41, 1.16) <sup>b</sup>       | 0.16         |
| <i>TLR8</i> (rs5979785) <sup>d</sup> | 0.84 (0.64, 1.09) <sup>b</sup>       | 0.18         | 0.90 (0.65, 1.26) <sup>b</sup>          | 0.54    | 0.92 (0.63, 1.34) <sup>b</sup>       | 0.66         |
| <i>UBASH3A</i> (rs3788013)           | 1.22 (0.92, 1.63) <sup>b</sup>       | 0.17         | 1.28 (0.88, 1.87) <sup>b</sup>          | 0.20    | <b>1.76 (1.15, 2.69)<sup>b</sup></b> | <b>0.01</b>  |
| rs10517086                           | *                                    | *            | 1.60 (0.89, 2.87) <sup>c</sup>          | 0.12    | <b>1.90 (1.28, 2.83)<sup>b</sup></b> | <b>0.002</b> |

Abbreviations: CI, confidence interval; DAISY, Diabetes Autoimmunity Study in the Young; HLA, human leukocyte antigen; HR, hazard ratio; IA, islet autoimmunity; MAF, minor allele frequency; T1D, type 1 diabetes.

<sup>a</sup>Adjusted for age at first autoantibody positive visit.

<sup>b</sup>SNP analyzed additively with HR representing increase in risk for each additional minor allele.

<sup>c</sup>SNP analyzed dichotomously with HR representing increase in risk for at least one minor allele.

<sup>d</sup>*TLR8* (rs5979785) is adjusted for sex because it is on the X chromosome.

\*SNP rs10517086 did not meet the assumptions of proportional hazards in the development of IA analysis.
